# Supplementary material for: Tuning the Cell-Free Protein Synthesis System for Biomanufacturing of Monomeric Human Filaggrin
Source: Front Bioeng Biotechnol. 2020 Oct 29;8:590341. doi: 10.3389/fbioe.2020.590341 (PMC7658397; doi:10.3389/fbioe.2020.590341)
Supplement: Supplementary file 1 [file Data_Sheet_1.docx]

Supplementary Material

Tuning the cell-free protein synthesis system for biomanufacturing of monomeric human filaggrin

Jeehye Kim1, Caroline E. Copeland1, Kosuke Seki2,3, Bastian Vögeli2, and Yong-Chan Kwon1,4,*

1Department of Biological and Agricultural Engineering, Louisiana State University, Baton Rouge, LA 70803, USA

2Department of Chemical and Biological Engineering, Northwestern University, Evanston, IL 60208, USA

3Chemistry of Life Processes Institute, Northwestern University, Evanston, IL 60208, USA

4Louisiana State University Agricultural Center, Baton Rouge, LA 70803, USA

***Correspondence:**Yong-Chan Kwon
yckwon@lsu.edu

ATGCAAGTCAGCACACACGAGCAGTCGGAAAGTTCTCATGGTTGGACAGGTCCATCAACTCGTGGTCGCCAAGGATCACGTCACGAGCAAGCACAAGATTCTAGCCGCCATTCTGCGAGCCAGGATGGCCAGGATACGATTCGCGGGCATCCTGGTAGCTCGCGTGGTGGACGTCAAGGTTATCACCACGAGCACAGTGTTGATTCGTCGGGGCACTCAGGTTCGCACCATAGCCACACGACGTCACAGGGACGCTCGGACGCGAGCCGTGGACAGTCGGGGTCTCGTTCAGCATCACGTACAACTCGTAATGAAGAGCAATCTGGCGATGGCAGTCGTCATAGCGGCAGTCGCCACCATGAGGCCTCAACTCACGCAGACATCTCTCGCCATTCTCAAGCGGTTCAAGGACAATCGGAAGGTAGCCGCCGCAGTCGCCGCCAAGGATCTAGCGTTTCCCAGGACTCAGATTCAGAGGGACATTCAGAAGACTCCGAACGTTGGTCTGGTAGTGCGTCCCGCAATCACCATGGCTCCGCCCAGGAGCAACTTCGCGACGGGTCACGCCATCCACGCAGTCACCAGGAAGATCGCGCGGGTCATGGACATTCAGCGGATAGTTCTCGCCAGAGCGGGACTCGTCATACGCAGACCTCGTCGGGAGGTCAGGCAGCTTCAAGTCATGAGCAAGCACGTAGCAGTGCGGGAGAGCGTCACGGCTCGCATCATCAGCAGAGTGCAGACAGCTCTCGTCACTCGGGGATCGGGCATGGTCAAGCTAGTTCGGCTGTTCGTGATTCCGGGCATCGTGGGTACTCGGGCAGCCAAGCGTCGGACAACGAGGGACATTCGGAAGACAGTGATACACAGTCAGTGAGCGCGCACGGGCAGGCTGGTTCCCACCAACAATCGCACCAAGAGTCGGCTCGCGGGCGCTCTGGTGAAACAAGCGGACATTCGGGATCCTTTTTATACTAATAA

**Supplementary Figure 1.** Gene sequence of *E. coli* codon-optimized Filaggrin 8th repeat (981 bp, including the start codon (ATG) and two stop codons (TAATAA)).


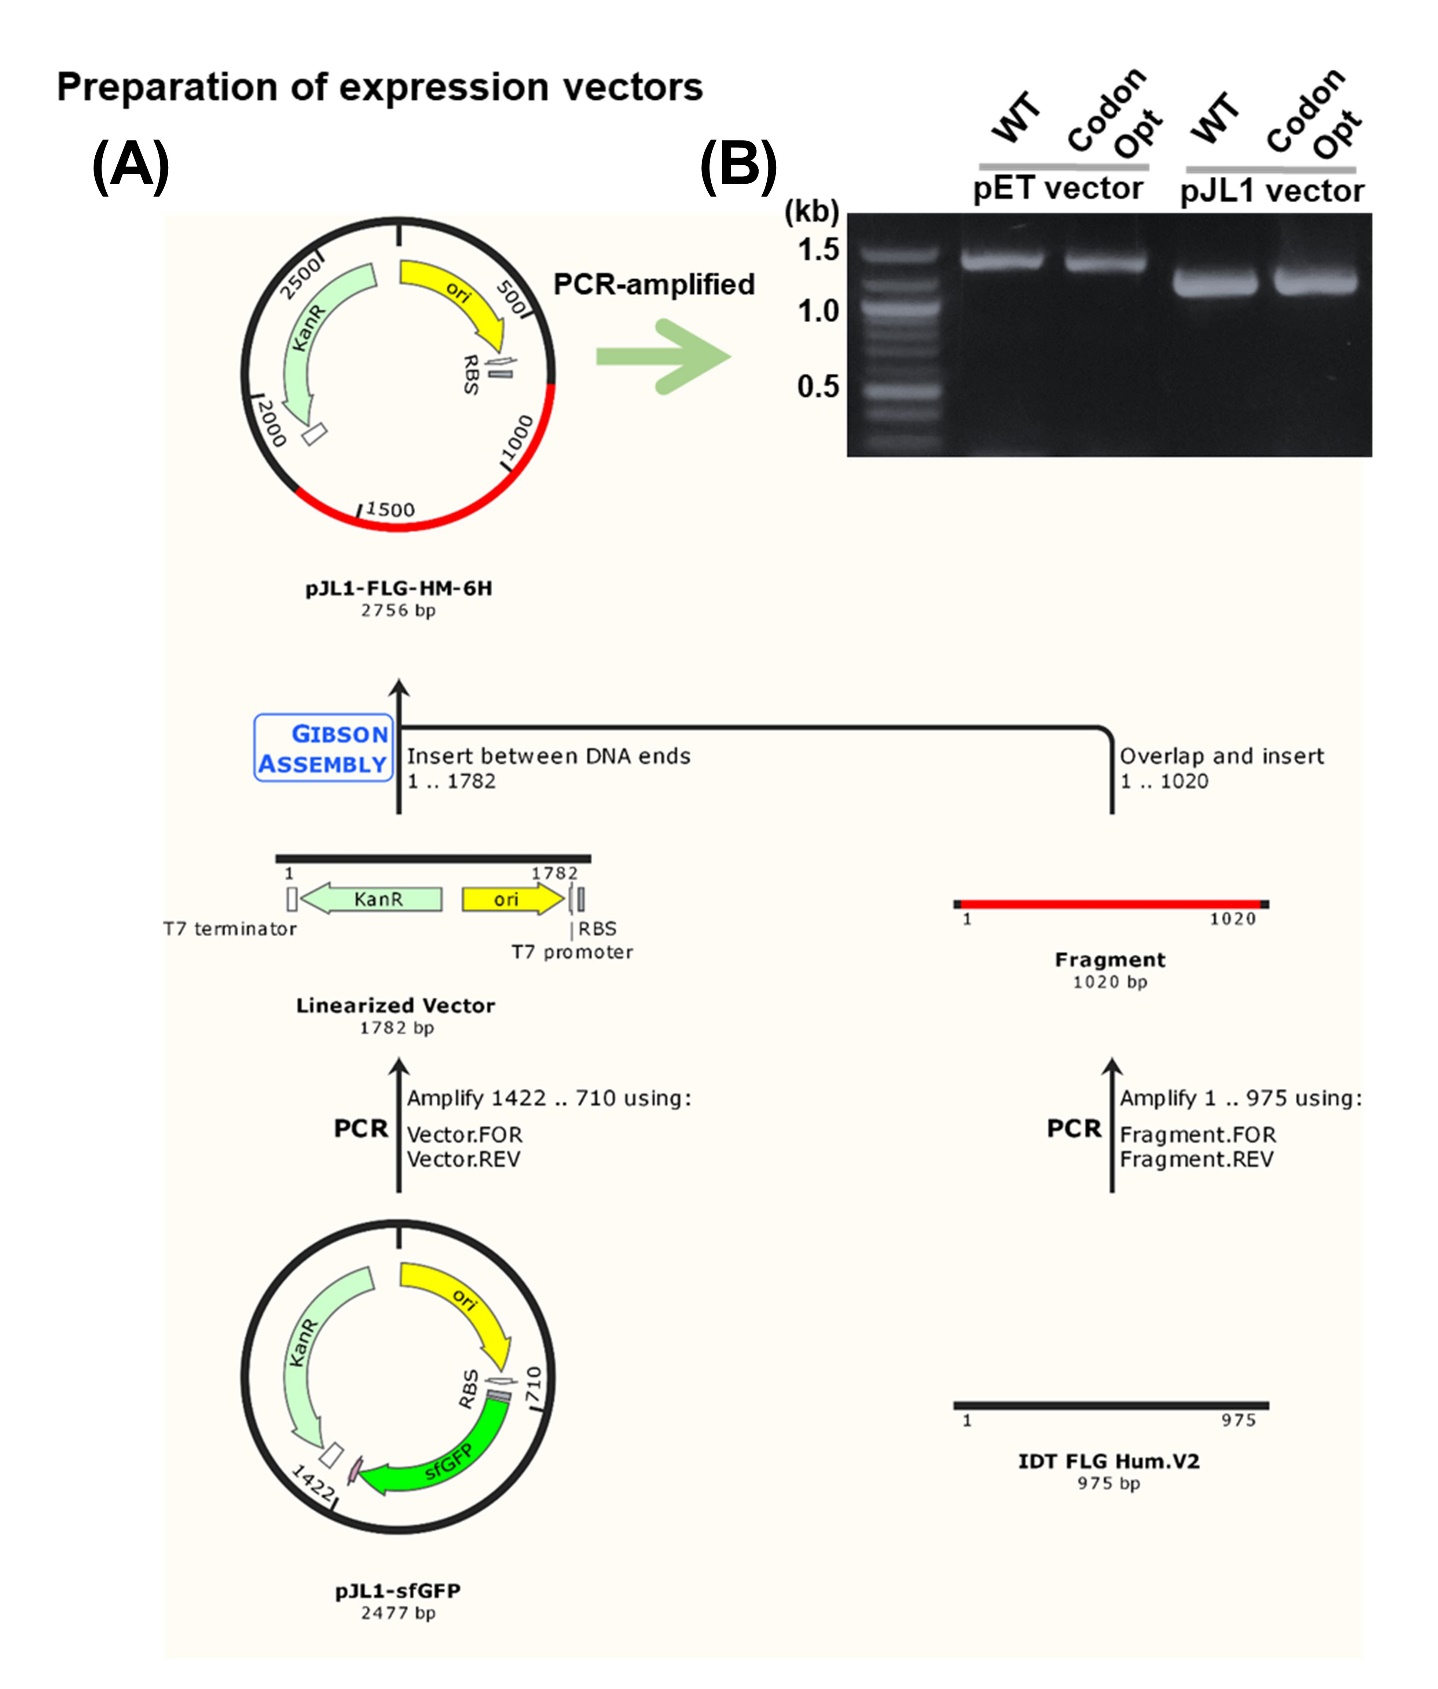
**Supplementary Figure 2.** **Preparation of expression vectors.** **(A)** a schematic cloning workflow for expression vectors preparation. **(B)** the PCR-amplified gene fragments from the expression vectors. The size of wild-type and codon-optimized FLG gene fragment is identical. The size of the PCR-amplified fragment, including the overlapping sequences with linearized vectors, vary. The gene sizes are 1389 bp from pETBlue-1 and 1174 bp for pJL1-based recombinant plasmids.

**
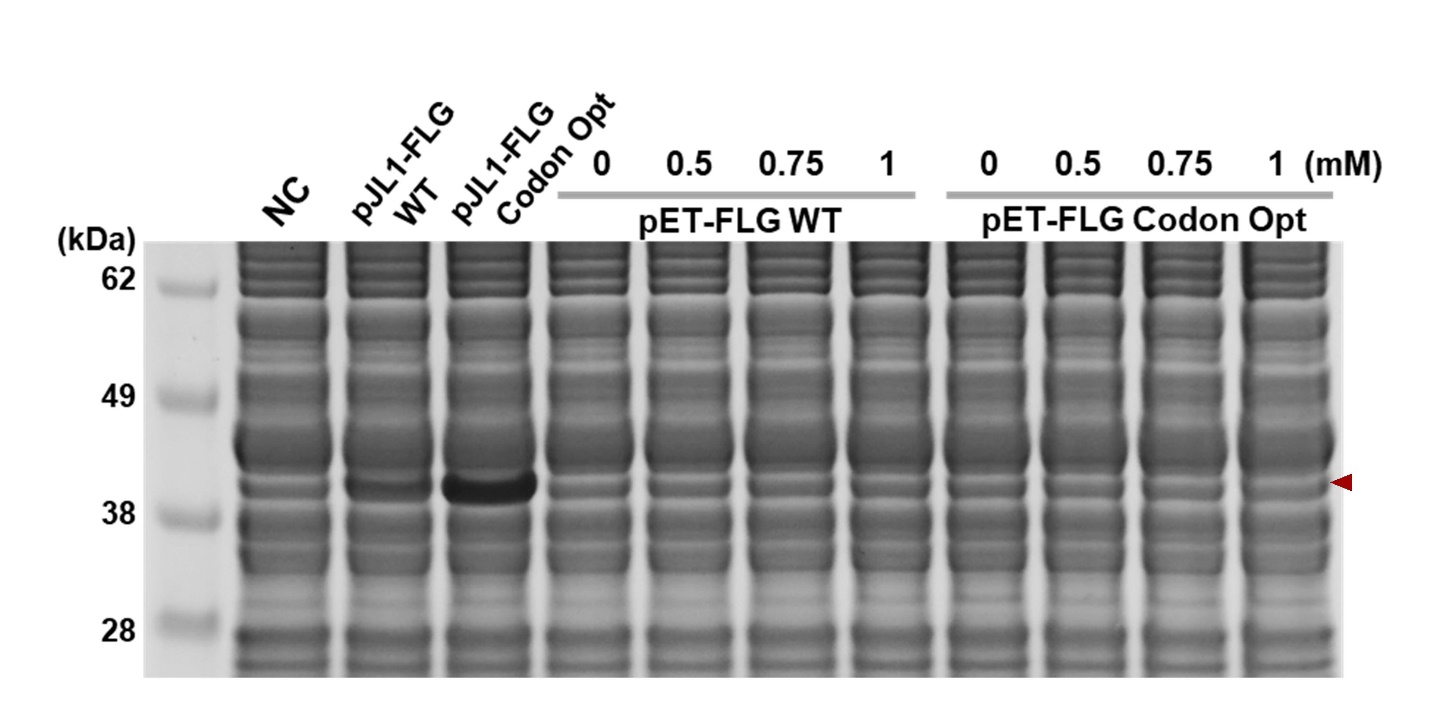
Supplementary Figure 3.** **The effect of the supplemental IPTG in the CFPS reaction (ROS extract).** The arrows indicate the synthesized FLG in the CFPS. Lane 1: protein size marker, lane 2: negative control without DNA, lane 3: pJL1-FLG WT addition, lane 4: pJL1-FLG Codon Opt addition, lane 5-8: pET-FLG WT addition (IPTG supplement concentration: 0, 0.5, 0.75, and 1 mM), lane 9-12: pET-FLG Codon Opt addition (IPTG supplement concentration: 0, 0.5, 0.75, and 1 mM). All CFPS reactions were performed at 30 °C for 20 hours.

**
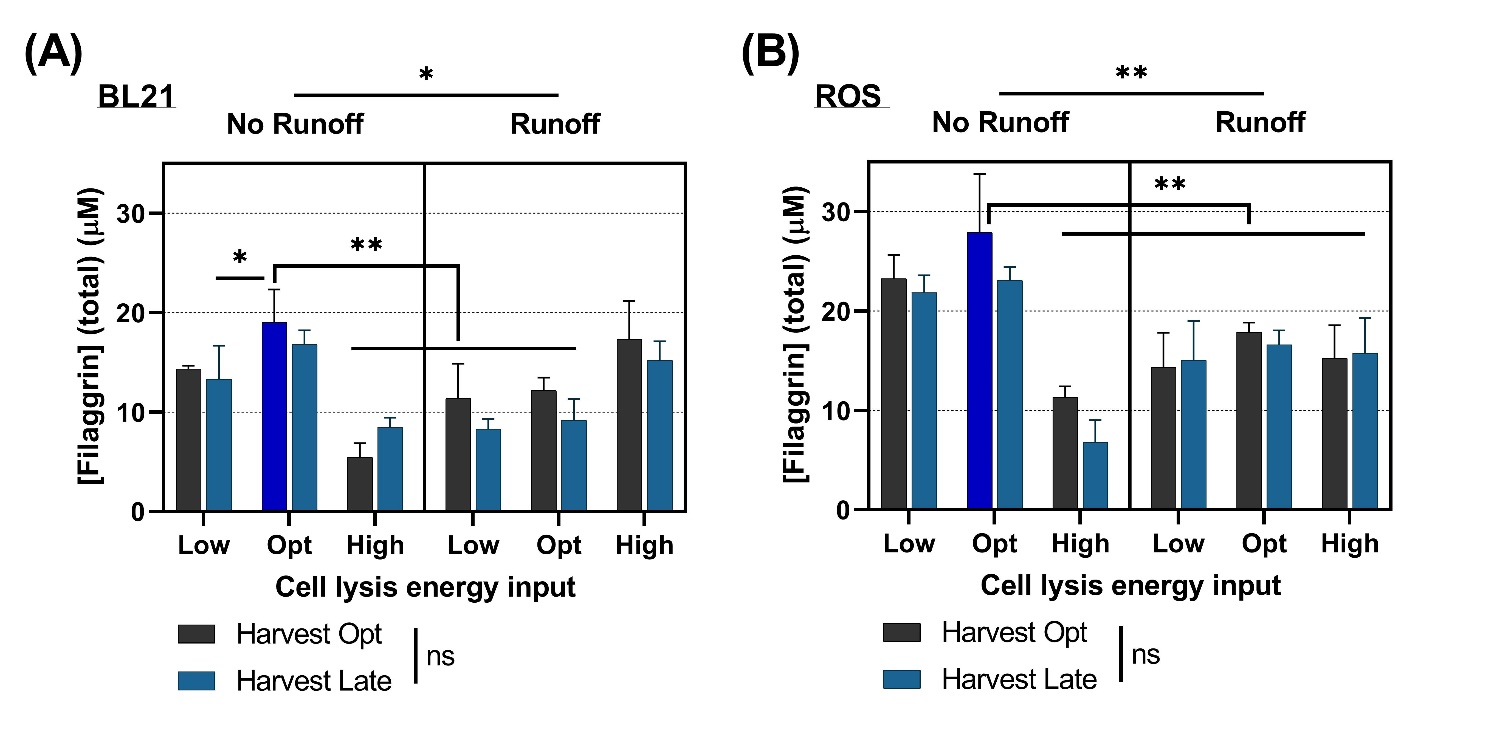
Supplementary Figure 4**. **The effect of the optimized cell-free extract for FLG expression. (A)** the FLG (total) protein yield using BL21 cell extract prepared in twelve processing variations. **(B)** the FLG (total) protein yield using ROS cell extract with twelve processing variations. Data represented as the mean ± SD (N = 3). Followed by three-way ANOVA along with normality test, the multiple comparison test was performed for Post hoc analysis. The Dunnett's multiple comparisons were used by comparing the mean of a group showing the highest expression with the other group means (11 comparisons). * *p* < 0.05, ** *p* < 0.001 was presented when the difference exists between the control group and another. All CFPS reactions were performed at 30 °C for 20 hours. The pJL1-FLG Codon Opt plasmid was used as the FLG expression vector for the BL21/ROS CFPS system.

**
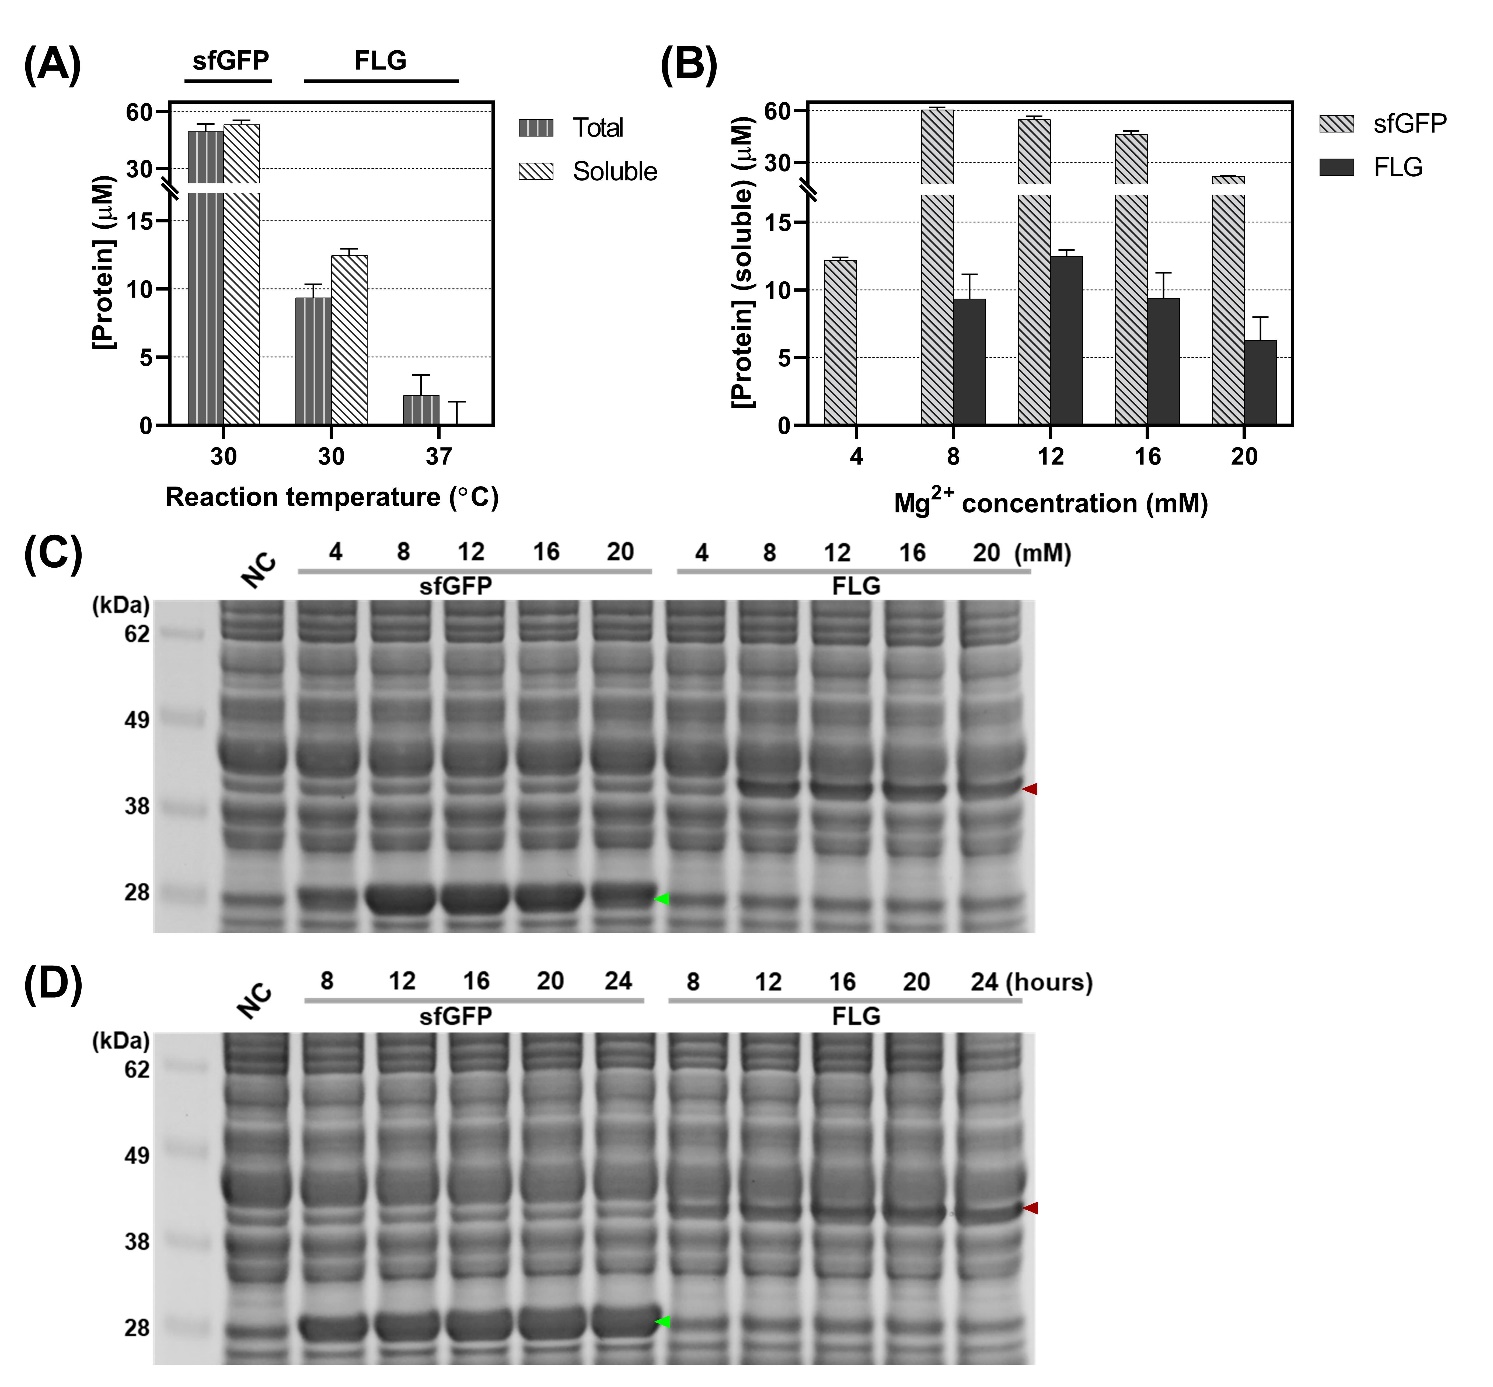
Supplementary Figure 5. Solubility of cell-free synthesized sfGFP and FLG, and optimization of Mg2+ and reaction time.** The green arrows indicate sfGFP and red arrows indicate FLG. **(A)** the sfGFP and FLG expression in CFPS at different incubation temperatures. **(B)** a side-by-side comparison of sfGFP and FLG expression at different Mg2+ concentrations. **(C)** the effect of magnesium ions concentration in CFPS. Lane 1: protein size marker, lane 2: negative control without DNA, lane 3-7: sfGFP expression at 4, 8, 12, 16, and 20 mM of Mg2+ concentration, lane 8-12: FLG expression at 4, 8, 12, 16, and 20 mM of Mg2+ concentration. **(D)** protein expression by incubation time. Lane 1: protein size marker, lane 2: negative control, lane 3-7: sfGFP expression at different reaction time (8, 12, 16, 20, and 24 hours), lane 8-12: FLG expression at reaction time (8, 12, 16, 20, and 24 hours).
